# Supplementary material for: Sample Preparation Strategies for the Effective Quantitation of Hydrophilic Metabolites in Serum by Multi-Targeted HILIC-MS/MS
Source: MDPI journal article supplement (doi:10.3390/metabo7020013), 2017-03-30
Supplement: s1 [file s1]

## Supplementary Materials: Sample Preparation Strategies for the Effective Quantitation of Hydrophilic Metabolites in Serum by Multi-Targeted HILIC-MS/MS

Elisavet Tsakelidou, Christina Virgiliou, Lemonia Valianou, Helen G. Gika, Nikolaos Raikos and Georgios Theodoridis

**Table S1.** Metabolites determined in serum by the applied LC-MS/MS method divided in three groups based on their intrinsic concentration in blood.

| Group A         | Group B                   | Group C       |
|-----------------|---------------------------|---------------|
| Hypoxanthine    | Glycine                   | Lactic        |
| Theobromine     | Xanthine                  | Aspartic acid |
| Caffeine        | Taurine                   | Lysine        |
| Benzoic acid    | Galactose                 | Uracil        |
| Thiamine        | 2-Hydroxy-isovaleric acid | Glucose       |
| Thymidine       | 2-Hydroxy-isobutyric acid |               |
| Nicotinamide    | Leucine                   |               |
| Creatinine      | Isoleucine                |               |
| Acetylcarnitine | Tyrosine                  |               |
| Ribose          | Valine                    |               |
| Choline         | Phenylalanine             |               |
| Betaine         | Methionine                |               |
| Putrescine      | Inosine                   |               |
| Creatine        | Hypotaurine               |               |
| TMAO            | Pyruvic acid              |               |
| Pyridoxine      | Proline                   |               |
| Cotinine        | Uridine                   |               |
| Lactose         | Pyroglutamic acid         |               |
|                 | Alanine                   |               |
|                 | Asparagine                |               |
|                 | Threonine                 |               |
|                 | Glutamine                 |               |
|                 | Glutamic acid             |               |
|                 | Serine                    |               |
|                 | Ornithine                 |               |
|                 | Tryptophan                |               |
|                 | 3-Methylhistidine         |               |
|                 | Sarcosine                 |               |
|                 | Arginine                  |               |
|                 | Hippuric acid             |               |

**Table S2.** Spiking concentrations for the standard addition calibration curves and for the assessment of recovery.

|                |                    | Concentrations in serum      |                              |                              |
|----------------|--------------------|------------------------------|------------------------------|------------------------------|
|                | spiking            | Group A ( $\mu\text{g/mL}$ ) | Group B ( $\mu\text{g/mL}$ ) | Group C ( $\mu\text{g/mL}$ ) |
| 5 point curves | Level 1            | 0.08                         | 0.72                         | 3.80                         |
|                | Level 2            | 0.20                         | 1.80                         | 9.50                         |
|                | Level 3            | 0.50                         | 4.50                         | 23.80                        |
|                | Level 4            | 1.00                         | 9.00                         | 47.50                        |
|                | Level 5            | 1.20                         | 10.80                        | 57.00                        |
| <b>LQC</b>     | low level spiking  | 0.10                         | 0.90                         | 4.75                         |
| <b>HQC</b>     | high level spiking | 1.00                         | 9.00                         | 47.50                        |
